# Supplementary material for: Transurethral Resection of Non-Muscle Invasive Bladder Tumors Combined with Fluorescence Diagnosis and Photodynamic Therapy with Chlorin e6-Type Photosensitizers
Source: J Clin Med. 2021 Dec 31;11(1):233. doi: 10.3390/jcm11010233 (PMC8745686; doi:10.3390/jcm11010233)
Supplement: Supplementary file 1 [file jcm-11-00233-s001.zip › jcm-1454411-supplementary.pdf]

**“Transurethral resection of non-muscle invasive bladder tumors combined with fluorescence diagnosis and photodynamic therapy with chlorin e<sub>6</sub>-type photosensitizers”**

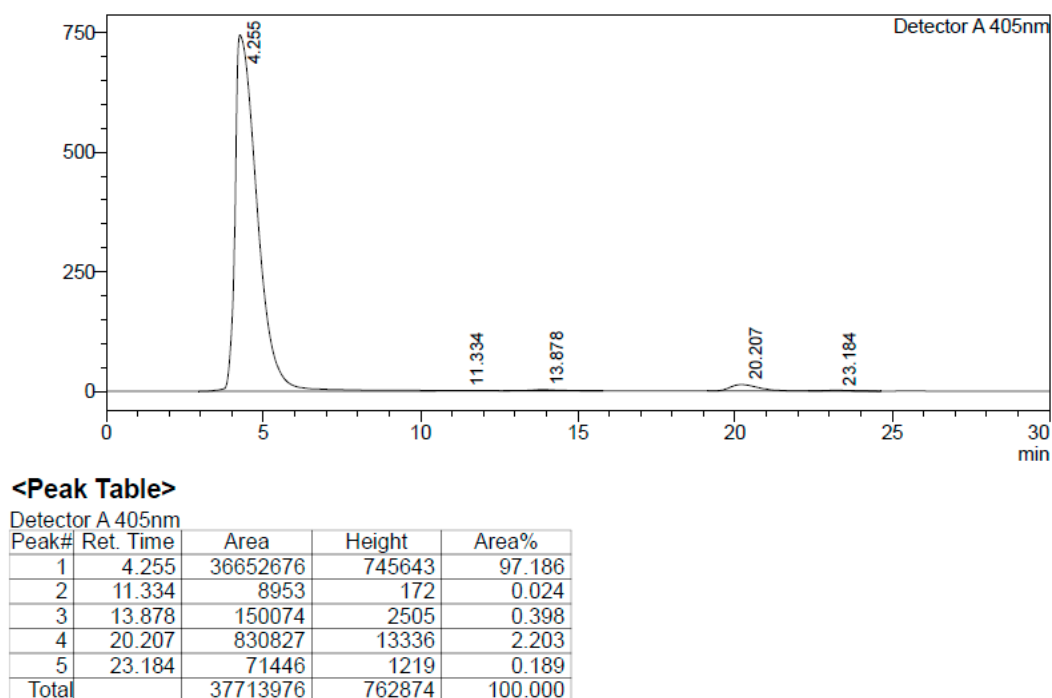

(a)

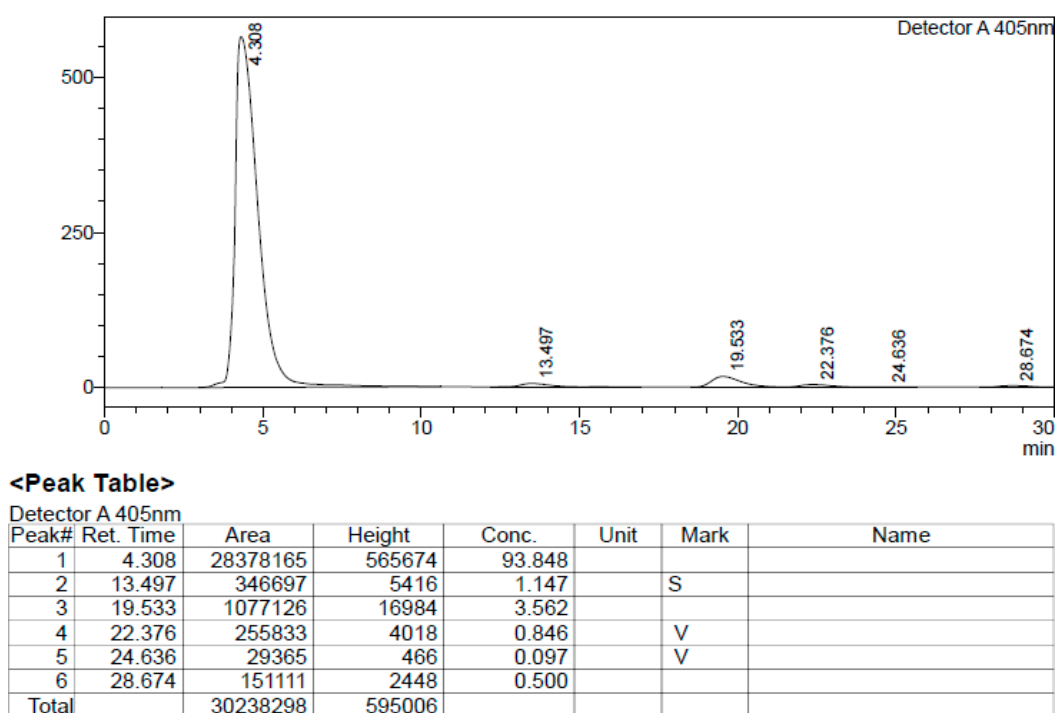

(b)

**Figure S1.** The HPLC analysis of “Fotoran e<sub>6</sub>” (a) and “Fotoditazin” (b) purity with a PLC Shimadzu Prominence equipped with the SPD-20 A detector.

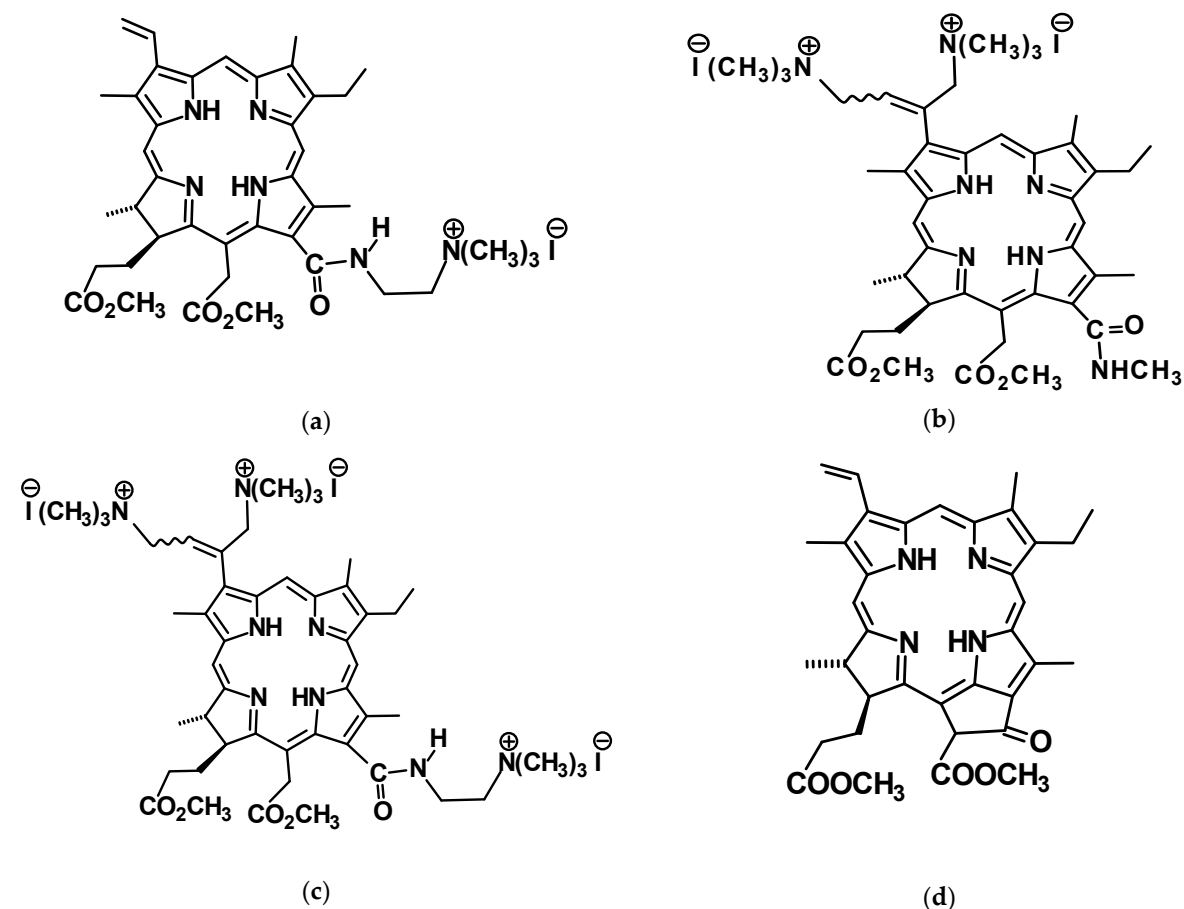

**Figure S2.** Molecular structures of PSs mentioned in Table 1 of the main text: (a) 13(1)-N-(2-N'*N'*N'-trimethyl-ammonioethyl iodide)amide chlorin *e*<sub>6</sub> 15(2),17(3)-dimethyl ester (Monocationic chlorin), (b) 3(1),3(2)-bis-(N,N,N-trimethylaminomethyl iodide) chlorin *e*<sub>6</sub> 13(1)-N-methylamide 15(2),17(3)-dimethyl ester (Dicationic chlorin); (c) 3(1),3(2)-bis-(N,N,N-trimethylaminomethyl iodide) chlorin *e*<sub>6</sub> 13(1)-N'-(2-N'',N'',N''-trimethylammonioethyl iodide)amide 15(2),17(3)-dimethyl ester (Tricationic chlorin); (d) pheophorbide *a* 17(3)-methyl ester (methylpheophorbide *a*).

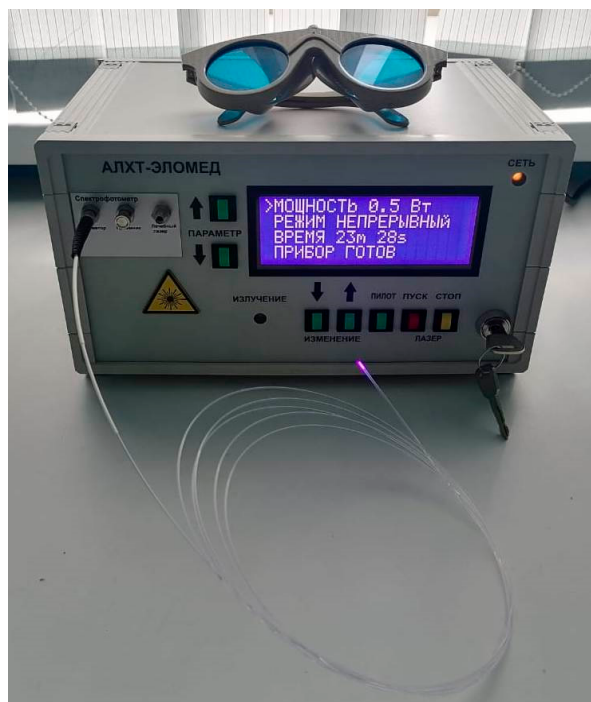

(a)

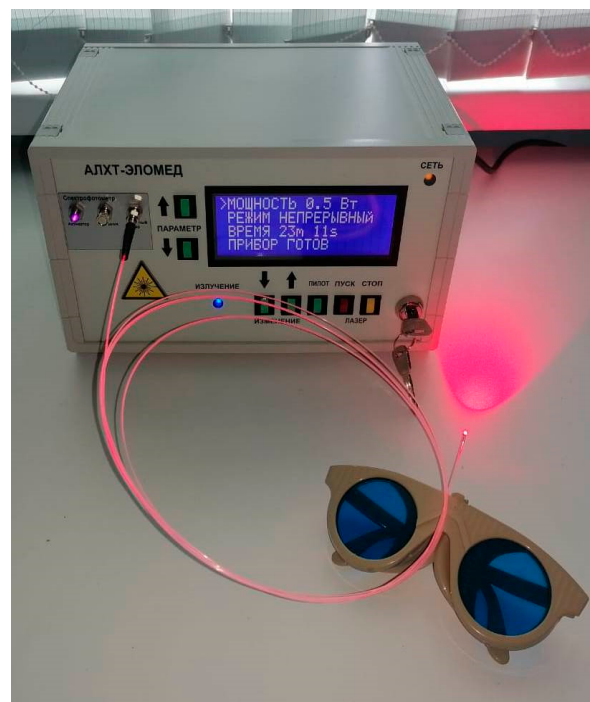

(b)

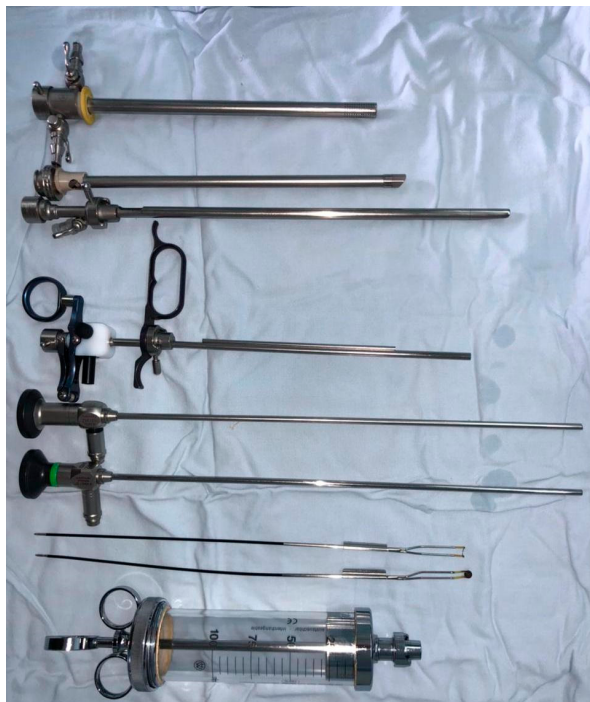

(c)

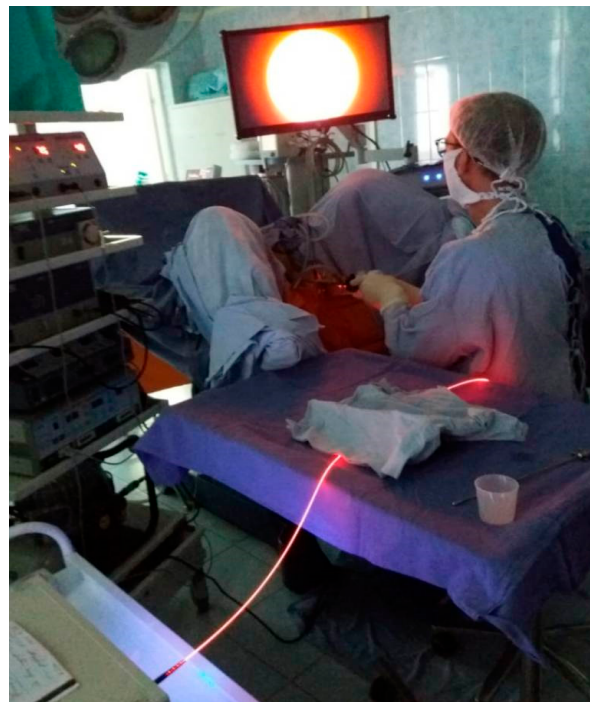

(d)

**Figure S3.** Activated “ALXT-Elomed” laser at 400 nm with a cylindrical diffuser for FD (a) and at 660 nm with a microlens for PDT (b); a standard set of instruments for TURB (c) and PDT of the tumor bed performed by Oleg A. Privalov at IRCH (d).

**Video S1** of TURB+FD+PDT is available on-line at [https://www.youtube.com/watch?v=R73CVzE-owQ&feature=emb\\_imp\\_woyt](https://www.youtube.com/watch?v=R73CVzE-owQ&feature=emb_imp_woyt) or <https://elomed.ru/lazer-dlya-uologii.html>

### Calculation of irradiation time for the PDT treatment

Irradiation time both of the tumor bed and the whole bladder was calculated in a similar way as described several times [8,24,28]. Briefly, after fulguration, the size of the tumor bed was estimated *via* a 5-Fr catheter with the length markings inserted into the central axis of the bladder. The radius of a light spot was chosen to be 0.4–0.5 cm larger than the radius of the tumor bed. The square of the light spot was calculated as follows

$$S = \pi \cdot r^2 = \pi \cdot (d/2)^2 \quad (S1)$$

The fluence rate ( $P_s$ , W/cm<sup>2</sup>) was calculated by

$$P_s = P/S, \quad (S2)$$

and irradiation time ( $\tau$ , sec) as

$$\tau = D/P_s, \quad (S3)$$

where  $P$  is the output beam power (W) and  $D$  is the necessary light dose (J/cm<sup>2</sup>).

To compute time of diffuse irradiation of the whole bladder, the spherical bladder model was applied. The bladder radius was calculated from its volume as follows

$$r = \sqrt[3]{\frac{3}{4} V / \pi} \quad (S4)$$

The internal area of the bladder ( $S_{ia}$ , cm<sup>2</sup>) and irradiation time were estimated by the following way

$$S_{ia} = 4 \cdot \pi \cdot r^2 \quad (S5)$$

$$\tau = D \cdot S_{ia} / P \quad (S6)$$

### References

8. Lee, J.Y.; Diaz, R.R.; Cho, K.S.; Lim, M.S.; Chung, J.S.; Kim, W.T.; Ham, W.S.; Choi, Y.D. Efficacy and safety of photodynamic therapy for recurrent, high grade nonmuscle invasive bladder cancer refractory or intolerant to bacille Calmette-Guérin immunotherapy. *J. Urol.* **2013**, *190*, 1192–1199. <https://doi.org/10.1016/j.juro.2013.04.077>.
24. Kustov, A.V.; Berezin, D.B.; Strelnikov, A.I.; Lapochkina, N.P. *Antitumor and Antimicrobial Photodynamic Therapy: Mechanisms, Targets, Clinical Laboratory Research. A Practical Guide*; Gagua, A.K., Ed.; Largo: Moscow, Russia, 2020; pp. 1–108. (In Russian)
28. Chin, W. Photosensitizing Effects Chlorin e<sub>6</sub>—Polyvinylpyrrolidone for Fluorescence Guided Photodynamic Therapy of Cancer. Ph.D. Thesis, Singapore National University, Singapore, 2009.
